# Supplementary material for: Acute Diarrhoea in Children: Determination of Duration Using a Combined Bismuth Hydroxide Gel and Oral Rehydration Solution Therapy vs. Oral Rehydration Solution
Source: MDPI journal article supplement (doi:10.3390/children3040045), 2016-12-21
Supplement: s1 [file s1]

**COMITÉ DE BIOÉTICA "Dr. Vicente Federico Del Giúdice"**  
**COMISIÓN DE EVALUACIÓN DE PROTOCOLOS DE INVESTIGACIÓN CLÍNICA**  
**HOSPITAL NACIONAL PROFESOR ALEJANDRO POSADAS**

El Palomar, 12 de Noviembre de 2010

Sr. Investigador:  
 Dra. Maria del Carmen Toca.  
 Sr. Coordinador de Docencia e Investigación:  
 Dr. Hernando Sala  
 Sr. Pte. del Consejo de Administración:  
 Dr. Miguel Angel Haxhi  
 S \_\_\_\_\_ / \_\_\_\_\_ D

Ref: Protocolo "*Diarrea aguda Infantil: evaluación de eficacia entre el tratamiento combinando gel de hidróxido de bismuto coloidal y sales de rehidratación oral versus sales de rehidratación oral*", presentado por la Dra. Maria del Carmen Toca.

**COORDINADOR**

**Carlos Apezteguia**  
 Médico intensivista. Investigador

**VOCALES**

**Lidia Albano**  
 Médica intensivista pediátrica

**Lic. Graciela Andrián**  
 Psicóloga. Mda. de Bioética

**Noemí Cacace Linares**  
 Médica intensivista. Farmacóloga

**Pablo Díaz Aguiar**  
 Médico internista. Auditor

**C. Alicia García Otero**  
 Médica oncóloga  
 Mg. en Ética Aplicada

**Horacio A. Repetto**  
 Médico Pediatra. Investigador

**Prof. Ma. Fernanda Sabio**  
 Filósofa. Doctoranda en Bioética

**Dra. Mirta di Michele**  
 Neonatóloga

La documentación evaluada (153 pag.) es la siguiente:

- |                                                                                 |         |
|---------------------------------------------------------------------------------|---------|
| • Protocolo de investigación                                                    | 51 pag. |
| • Anexo I (formulario de modificación al protocolo autorizado)                  | 05 pag. |
| • Consentimiento Informado (con las modificaciones solicitadas por este Comité) | 05 pag. |
| • Anexo III Formulario de Informes                                              | 02 pag. |
| • Anexo IV Formulario Cierre de Estudio                                         | 02 pag. |
| • Anexo V Formulario de RAM                                                     | 02 pag. |
| • Anexo VI Formulario de Eventos Adversos                                       | 02 pag. |
| • Anexo VII Registro individual del Paciente                                    | 14 pag. |
| • Anexo VIII Plantilla de Reclutamiento e Identificación de Pacientes           | 02 pag. |
| • Anexo IX Planilla Control del paciente                                        | 02 pag. |
| • Anexo X Instructivo planilla Control del paciente                             | 03 pag. |
| • Anexo XI Póliza de Seguros                                                    | 02 pag. |
| • Procedimiento Para Asegurar Paciente Incluido en el Estudio Bidiainfa         | 01 pag. |
| • Modelo de Póliza de seguro                                                    | 14 pag. |
| • Carta del Sponsor a la Investigadora (13/10/10)                               | 01 pag. |
| • Manual del Investigador                                                       | 56 pag. |
| • Modelo de Convenio de Cooperación                                             | 04 pag. |

El protocolo respeta los lineamientos de la Declaración de Helsinki (2000), las Guías de la CIOMS (2002), la Guía de Buena Práctica Clínica ICH (1996) y las Disposiciones de la ANMAT N° 5330/97; 1067/08; 6550/08; 1310/09 y la Resolución del Ministerio de Salud de la Nación N° 1490/07. Por lo tanto, este Comité **APRUEBA** el protocolo y **AUTORIZA LA IMPLEMENTACIÓN** del estudio en este Hospital. Se solicita al investigador envíe a esta CEPIC copia de el alta del seguro de cada paciente enrolado.

Saludan ate.

Dra. Lidia Albano

Mirta di Michele

Alicia García Otero

Maria Fernanda Sabio

Carlos Apezteguia
