# Supplementary material for: Acute Diarrhoea in Children: Determination of Duration Using a Combined Bismuth Hydroxide Gel and Oral Rehydration Solution Therapy vs. Oral Rehydration Solution
Source: MDPI journal article supplement (doi:10.3390/children3040045), 2016-12-21
Supplement: s1 [file s1]

**CONSENTIMIENTO INFORMADO****DIARREA AGUDA INFANTIL: EVALUACIÓN DE EFICACIA ENTRE EL  
TRATAMIENTO COMBINADO GEL DE HIDRÓXIDO DE BISMUTO COLOIDAL Y  
SALES DE REHIDRATACIÓN ORAL VERSUS SALES DE REHIDRATACIÓN  
ORAL**

Estudio Clínico Controlado, Prospectivo, Randomizado, Doble Ciego.  
(Estudio BIDIAINFA)

**Investigador:**

---

---

---

---

**¿Por qué se eligió a su hijo como candidato para participar en el estudio?**

Su hijo ha sido seleccionado como candidato para participar en este estudio porque presenta una diarrea infantil aguda, la cual es uno de los principales problemas que afectan a la población infantil, generando una demanda importante de los servicios de salud. Las complicaciones de la diarrea infantil aguda son mayores en los países en desarrollo como el nuestro; por otra parte se calcula que el 40% de las muertes asociadas a la diarrea se deben principalmente a la diarrea aguda.

**Propósito del estudio**

En los últimos 20 años la mayoría de los esfuerzos destinados al control de la diarrea aguda estuvieron centrados en la utilización de sales de rehidratación oral (SRO). Si bien las SRO han reducido la mortalidad por diarrea aguda, las mismas no modifican su evolución. Las sales de rehidratación oral son efectivas en reemplazar el agua y los electrolitos que se pierden en la diarrea, pero no tienen efecto sobre la frecuencia de las deposiciones, el volumen de las heces ni la duración de la diarrea. Desde hace muchos años existe y se vende en nuestro país una medicación para la diarrea que contiene gel de hidróxido de bismuto coloidal. Este medicamento antidiarreico produce una reducción en la frecuencia de las deposiciones y un aumento de la consistencia de las heces.

El propósito de este estudio es tratar de demostrar que el uso simultáneo de gel de hidróxido de bismuto coloidal más SRO, ayuda a prevenir la deshidratación que la diarrea provoca, reduciendo significativamente la duración de la misma y disminuyendo el número de deposiciones diarreicas.

### **Consentimiento para participar en el estudio BIDIAINFA**

Si usted autoriza que su hijo participe en el estudio BIDIAINFA debe saber algunas cosas. Si acepta participar en el estudio su hijo puede recibir gel de hidróxido de bismuto coloidal más sales de rehidratación oral (SRO), o solamente ser tratado con SRO. También permitirá a los investigadores usar la información acerca de su hijo, como por ejemplo edad, sexo.

### **Recibir Crema de Bismuto Chobet con Pectina (gel de hidróxido de bismuto coloidal) o Excipientes Crema de Bismuto Chobet**

Si su hijo es seleccionado para este estudio y usted autoriza que él participe en el mismo, será asignado al azar (como tirando una moneda) para recibir gel de hidróxido de bismuto coloidal y/o sales de rehidratación oral y/o excipientes Crema de Bismuto Chobet. El Excipiente Crema de Bismuto Chobet es una solución formulada como la especialidad medicinal Crema de Bismuto Chobet con Pectina pero que no contiene ningún principio activo. Ni usted ni el médico sabrán si su hijo está tomando Crema de Bismuto Chobet (gel de hidróxido de bismuto coloidal) o Excipientes Crema de Bismuto Chobet más Sales de Rehidratación Oral.

Antes de que su hijo tome la medicación, el médico pediatra le preguntará por ejemplo sobre las características de la diarrea, fecha de comienzo, número de deposiciones; y le hará un examen médico completo. En el mismo consultorio su hijo recibirá la primera dosis de Crema de Bismuto Chobet (gel de hidróxido de bismuto coloidal) o Excipientes Crema de Bismuto Chobet. Posteriormente deberá respetar la posología (dosificación) que le indique el médico.

Hasta la fecha no han sido informados reacciones adversas atribuidas al gel de hidróxido de bismuto. Lo que sí podrá observar es que en algunos casos la materia fecal de su hijo puede aparecer de color negro. Los médicos del estudio estarán

atentos a cualquier reacción adversa que pueda surgir a su hijo. Por su parte usted podrá comunicarse las 24 horas y transmitir cualquier inconveniente que surja o inquietud que tenga.

El estudio así como la medicación que le entregue el médico son totalmente gratuitos. Usted no deberá abonar ningún dinero por ellos.

El médico controlará a su hijo hasta finalizar el tratamiento.

### **Información acerca del tratamiento - Participación en el estudio BIDIAINFA**

Este estudio permitirá evaluar la eficacia del tratamiento combinado de un antidiarreico autorizado por ANMAT y las Sales de Rehidratación Oral.

Es importante la participación de su hijo en este estudio, como también es importante que cumpla estrictamente las indicaciones del médico y, que concurra a los controles para saber la evolución de su hijo.

### **Consecuencias económicas de participar en el estudio BIDIAINFA**

Es importante aclarar que usted no recibirá ningún beneficio económico por permitir que su hijo participe en este estudio. También es importante aclarar que los estudios y tratamientos que se realicen a su hijo, no tendrán costo para usted.

En el supuesto caso que surja algún evento adverso como consecuencia de la medicación, o aparezca algún inconveniente derivado del estudio (ejemplo, necesidad de internar a su hijo), los costos económicos que resulten de los mismos estarán a cargo del patrocinante del estudio.

La participación de su hijo en el estudio será de 8 días.

### **Usted puede retirar a su hijo del estudio.**

Debe aclararse que su participación es voluntaria y, que puede negarse a seguir participando en este estudio en cualquier etapa del mismo. Si bien la participación de su hijo es importante, si por cualquier motivo personal usted decide retirar a su hijo del estudio puede hacerlo sin necesidad de tener que dar ninguna explicación y,

su hijo seguirá recibiendo el tratamiento médico que el pediatra considere más adecuado.

**Firma del consentimiento**

Este consentimiento se hace efectivo desde el momento que usted lo firma. Usted recibirá una copia de este consentimiento informado.

**ANTE CUALQUIER DUDA COMUNICARSE CON EL COMITÉ DE ÉTICA DEL HOSPITAL POSADAS TODOS LOS DIAS**

Datos del paciente

Nombre y apellido:

DNI:

Dirección:

Teléfono:

**AL FIRMAR ESTE FORMULARIO UD. ESTÁ ACEPTANDO PARTICIPAR DE UNA INVESTIGACIÓN MÉDICA EN FARMACOLOGÍA CLÍNICA DE CARÁCTER EXPERIMENTAL AUTORIZADA POR LA ADMINISTRACIÓN NACIONAL DE MEDICAMENTOS, ALIMENTOS Y TECNOLOGÍA MÉDICA, (ANMAT) SI TIENE ALGUNA DUDA SOBRE LO QUE LE HAN EXPLICADO SU MÉDICO O EL COMITÉ DE ÉTICA, ANTES DE FIRMAR, SEPA QUE PUEDE CONSULTAR A “A.N.M.A.T. RESPONDE”; LÍNEA GRATUITA 0800-333-1234, O AL 011-4340-0800, DE LUNES A VIERNES DE 8 A 17 HS.**

Yo,

Sr/Sra \_\_\_\_\_

\_\_\_\_\_

he leído y comprendido la información arriba suministrada. Voluntariamente consiento en que mi hijo participe en el estudio BIDIAINFA. También permito que los investigadores utilicen la información de mi hijo para extraer conclusiones del trabajo.

**Firma del padre o madre,**

\_\_\_\_\_

Aclaración de la Firma

\_\_\_\_\_

DNI

Dirección

\_\_\_\_\_

Teléfono:

**Firma del testigo**

Aclaración de la firma

\_\_\_\_\_

DNI

Dirección

Teléfono

Firma y sello del médico

Fecha

Consentimiento Informado Versión: 1

Fecha: 14/05/2010

Autorizado
